# Supplementary material for: Antihistamines Potentiate Dexamethasone Anti-Inflammatory Effects. Impact on Glucocorticoid Receptor-Mediated Expression of Inflammation-Related Genes
Source: Cells. 2021 Nov 5;10(11):3026. doi: 10.3390/cells10113026 (PMC8617649; doi:10.3390/cells10113026)
Supplement: Supplementary file 1 [file cells-10-03026-s001.zip › cells-1432798-supplementary.pdf]

## Supplementary Material

### Supplementary Table S1. Primers used for quantitative real-time PCR

| Primer             | Fw (5'-3')                  | Rv (5'-3')               | Reference <sup>1</sup> |
|--------------------|-----------------------------|--------------------------|------------------------|
| GILZ <sup>h</sup>  | AATGCGGCCACGGATG            | GGACTTCACGTTTCAGTGGACA   | NM_000758              |
| MKP1 <sup>h</sup>  | CTGCCTTGATCAACGTCTCA        | ACCCTTCCTCCAGCATTCTT     | NM_004417.4            |
| IL-8 <sup>h</sup>  | CTGCGCCAACACAGAAATTA        | ATTGCATCTGGCAACCCTAC     | NM_000584              |
| COX2 <sup>h</sup>  | TTCAAATGAGATTGTGGGAAAATTGCT | AGATCATCTCTGCCTGAGTATCTT | NM_000963.1            |
| GMCSF <sup>h</sup> | CATGTGAATGCCATCCAGGA        | GGAGGTCAAACATTCTGAGATGA  | NM_000758              |
| ACTB <sup>h</sup>  | GGACTTCGAGCAAGAGATGG        | AGCACTGTGTTGGCGTACAG     | NM_001101.3            |
| OPG <sup>m</sup>   | GGAAACAGAGAAGCCACGCAA       | GGTAGGAACAGCAAACCTGAAG   | NM_008764.3            |
| RANKL <sup>m</sup> | GGAGGATGAAACAAGCCTTTCA      | TCCAACCATGAGCCTTCCATC    | NM_011613.3            |
| OC <sup>m</sup>    | GCTCTGTCTCTCTGACCTCACA      | GGTAGGAACAGCAAACCTGAAG   | NM_007541.3            |
| ACTB <sup>m</sup>  | AGACTTCGAGCAGGAGATGG        | AGCACTGTGTTGGCATAGAG     | NM_007393.3            |

<sup>h</sup> human; <sup>m</sup> murine; <sup>1</sup> NCBI (National Center for Biotechnology Information) entry.

### Supplementary Figure S1

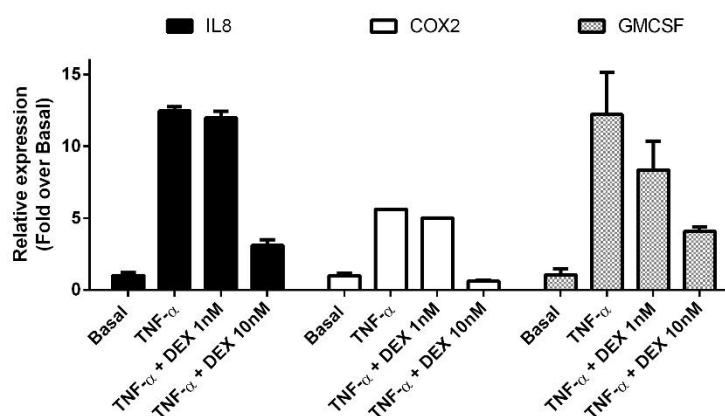

**Figure S1. Dexamethasone-induced transrepression of endogenous pro-inflammatory genes in A549 cells.** A549 cells were incubated with 2000 UI/ml TNF $\alpha$  for 4 h and then treated with dexamethasone (DEX) for 3 h, as indicated. IL-8, COX-2, and GMCSF mRNA levels were quantified by qPCR as described in the methods section of the main manuscript. Results are mean $\pm$ -SD of at least three independent experiments performed in triplicates.

### Supplementary Figure S2

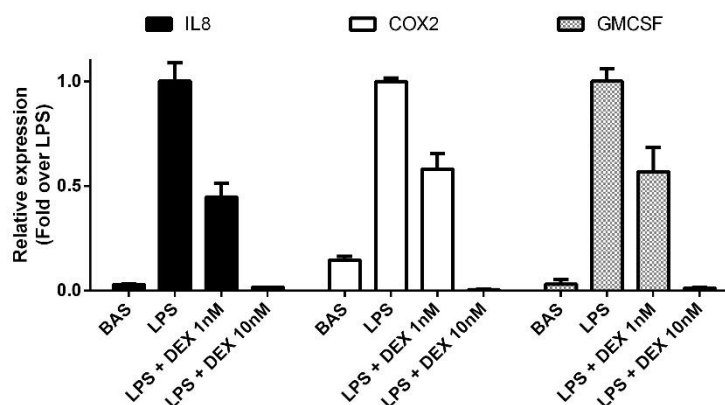

**Figure S2. Dexamethasone-induced transrepression of endogenous pro-inflammatory genes in U937 cells.** U937 cells were differentiated to macrophages with 100 nM PMA for 48 h and then stimulated with 1  $\mu$ g/ $\mu$ l LPS for 4 h. Then were exposed to dexamethasone (DEX) for 3 h, as indicated. IL-8, COX-2, and GMCSF mRNA levels were quantified by qPCR as described in the methods section of the main manuscript. Results are mean $\pm$ -SD of at least three independent experiments performed in triplicates.

### Supplementary Figure S3

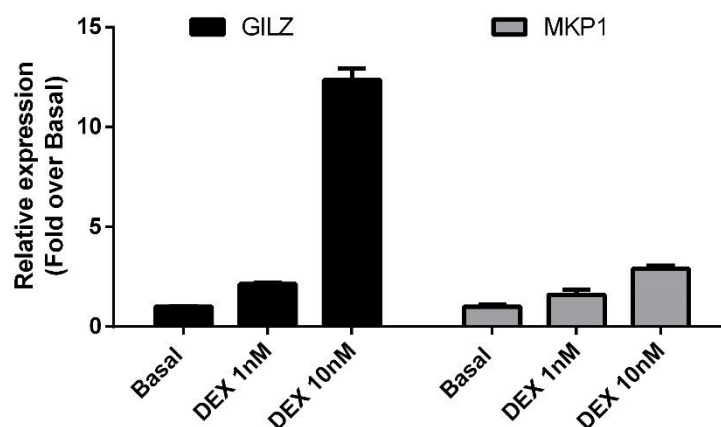

**Figure S3. Dexamethasone-induced expression of endogenous anti-inflammatory genes.** A549 cells were treated with dexamethasone (DEX) for 3 h, as indicated. GILZ and MKP1 mRNA levels were quantified by qPCR as described in the methods section of the main article. Results are mean $\pm$ -SD of at least three independent experiments performed in triplicates.

## Supplementary Figure S4

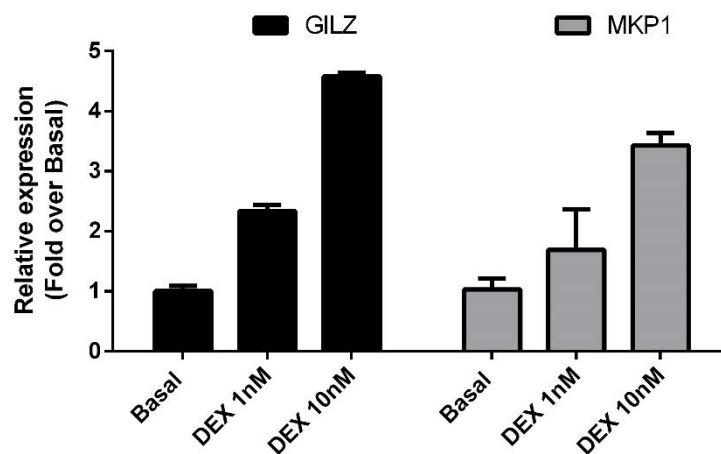

**Figure S4. Dexamethasone-induced expression of endogenous anti-inflammatory genes.** U937 cells were treated with dexamethasone (DEX) for 3 h, as indicated. GILZ and MKP1 mRNA levels were quantified by qPCR as described in the methods section of the main article. Results are mean $\pm$ SD of at least three independent experiments performed in triplicates.
